# Supplementary material
Source: PubMed Central journal article supplement (PMC4593707)

# Supplemental Figure S1

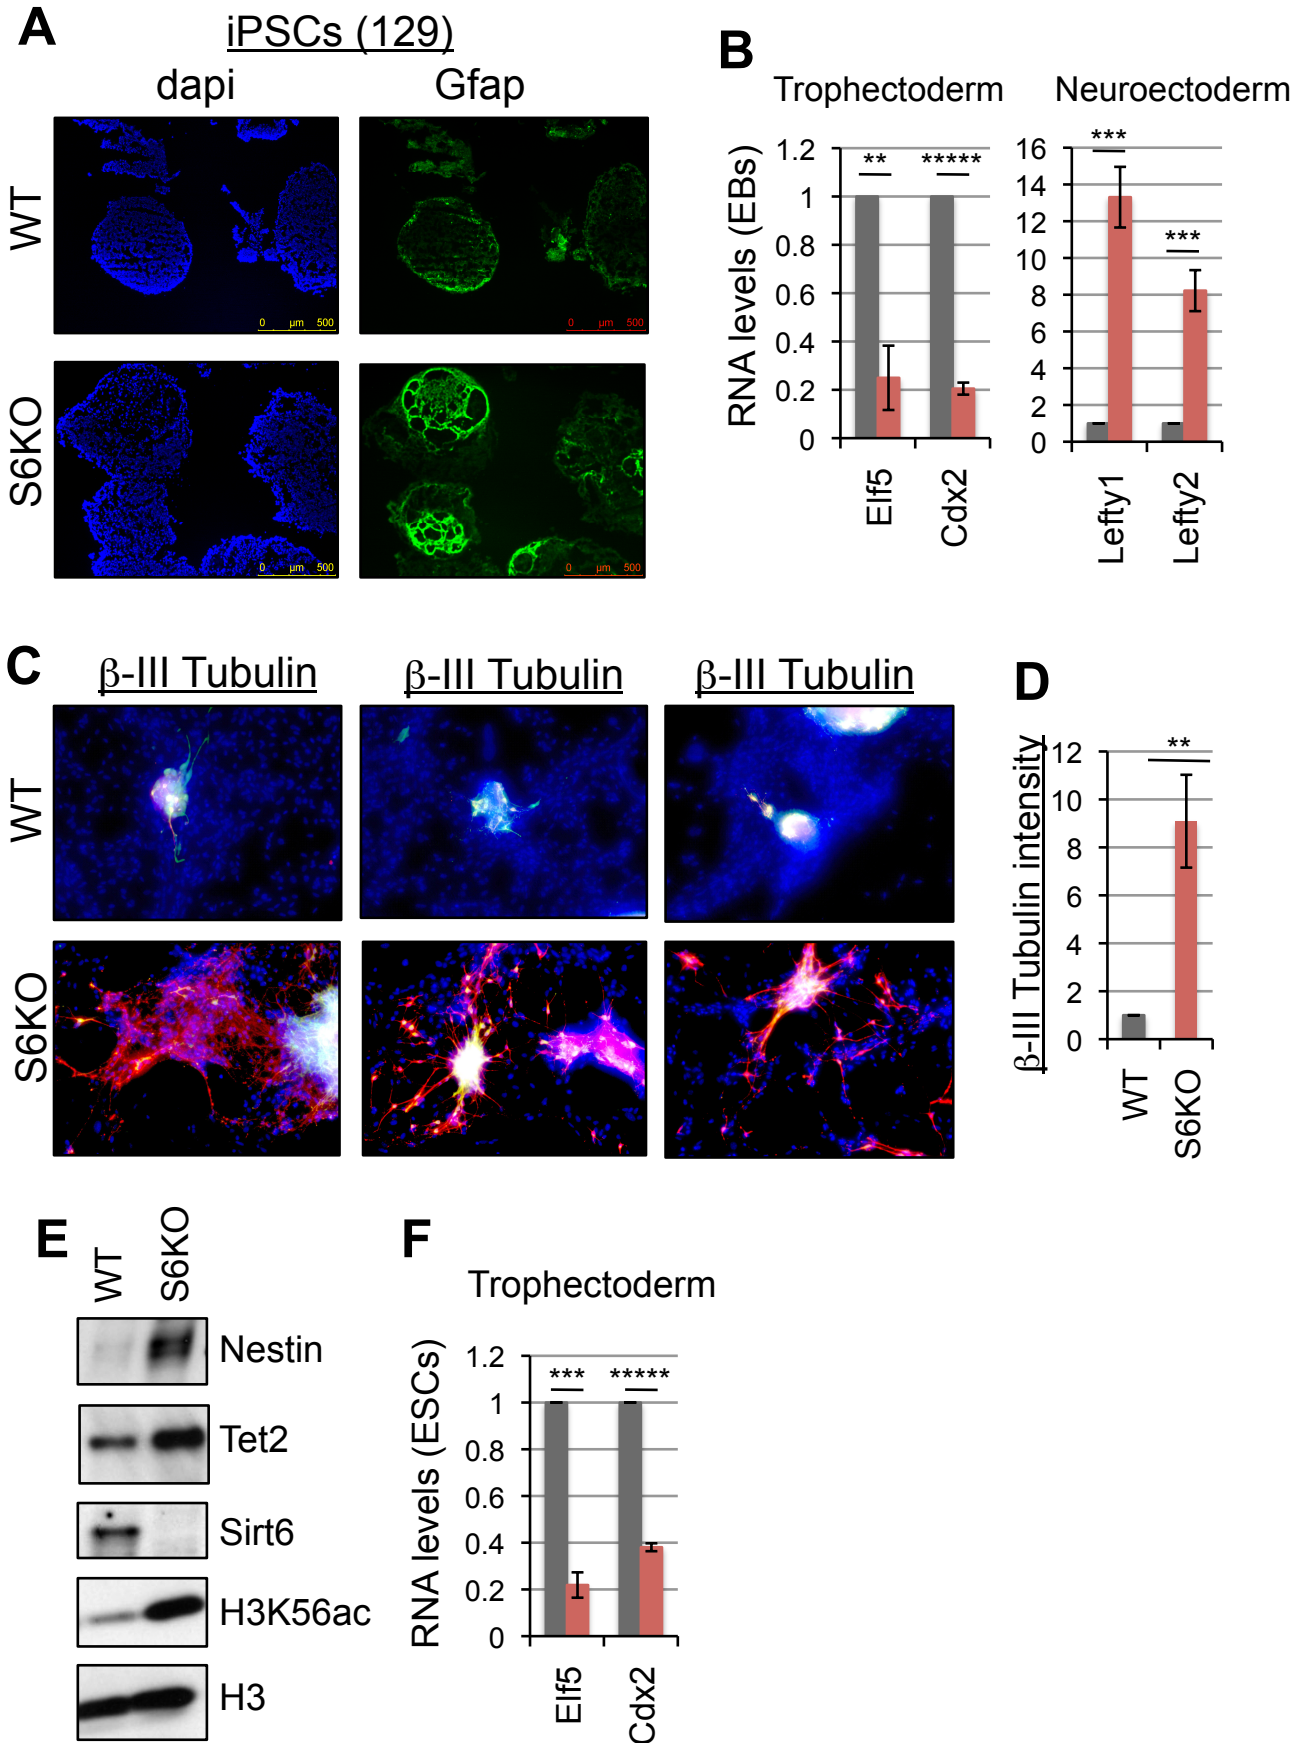

# Supplemental Figure S2

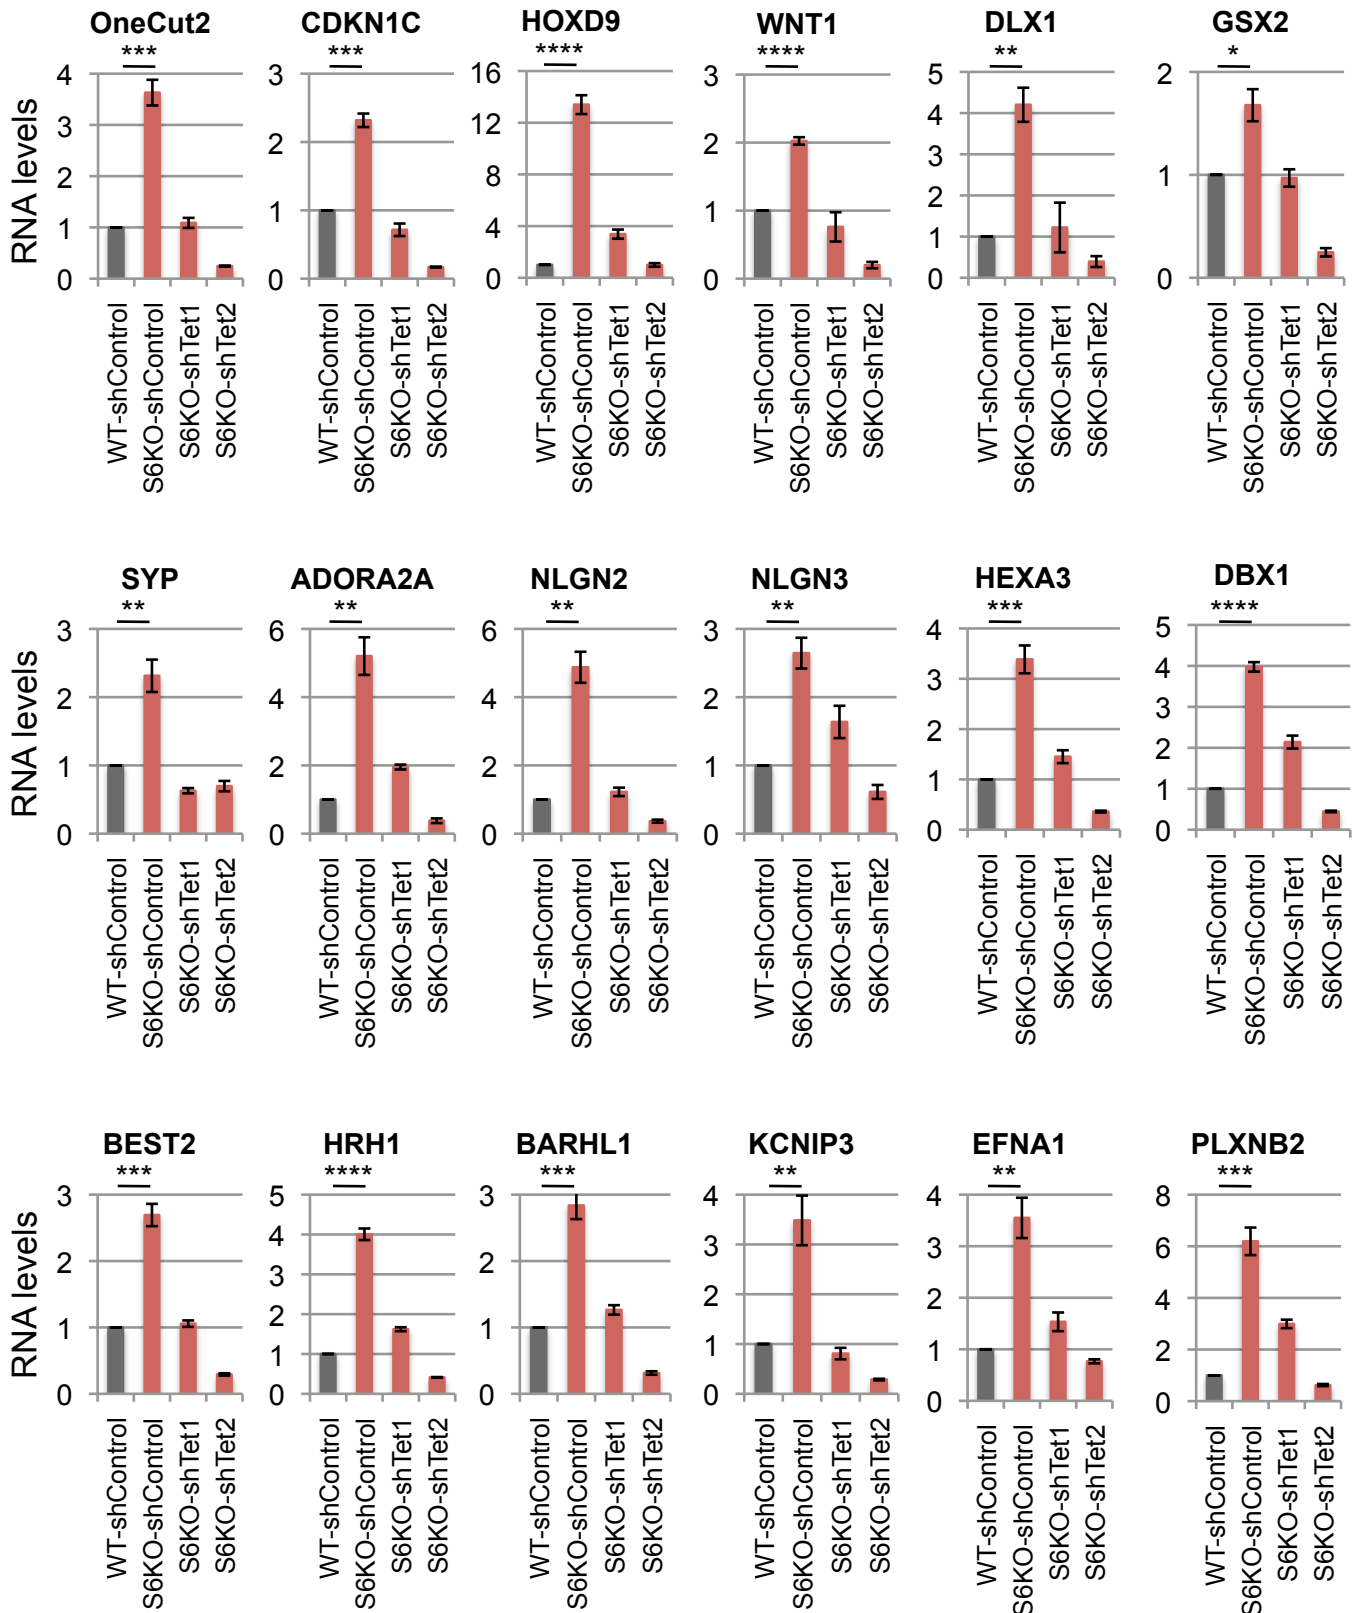

# Supplemental Figure S3

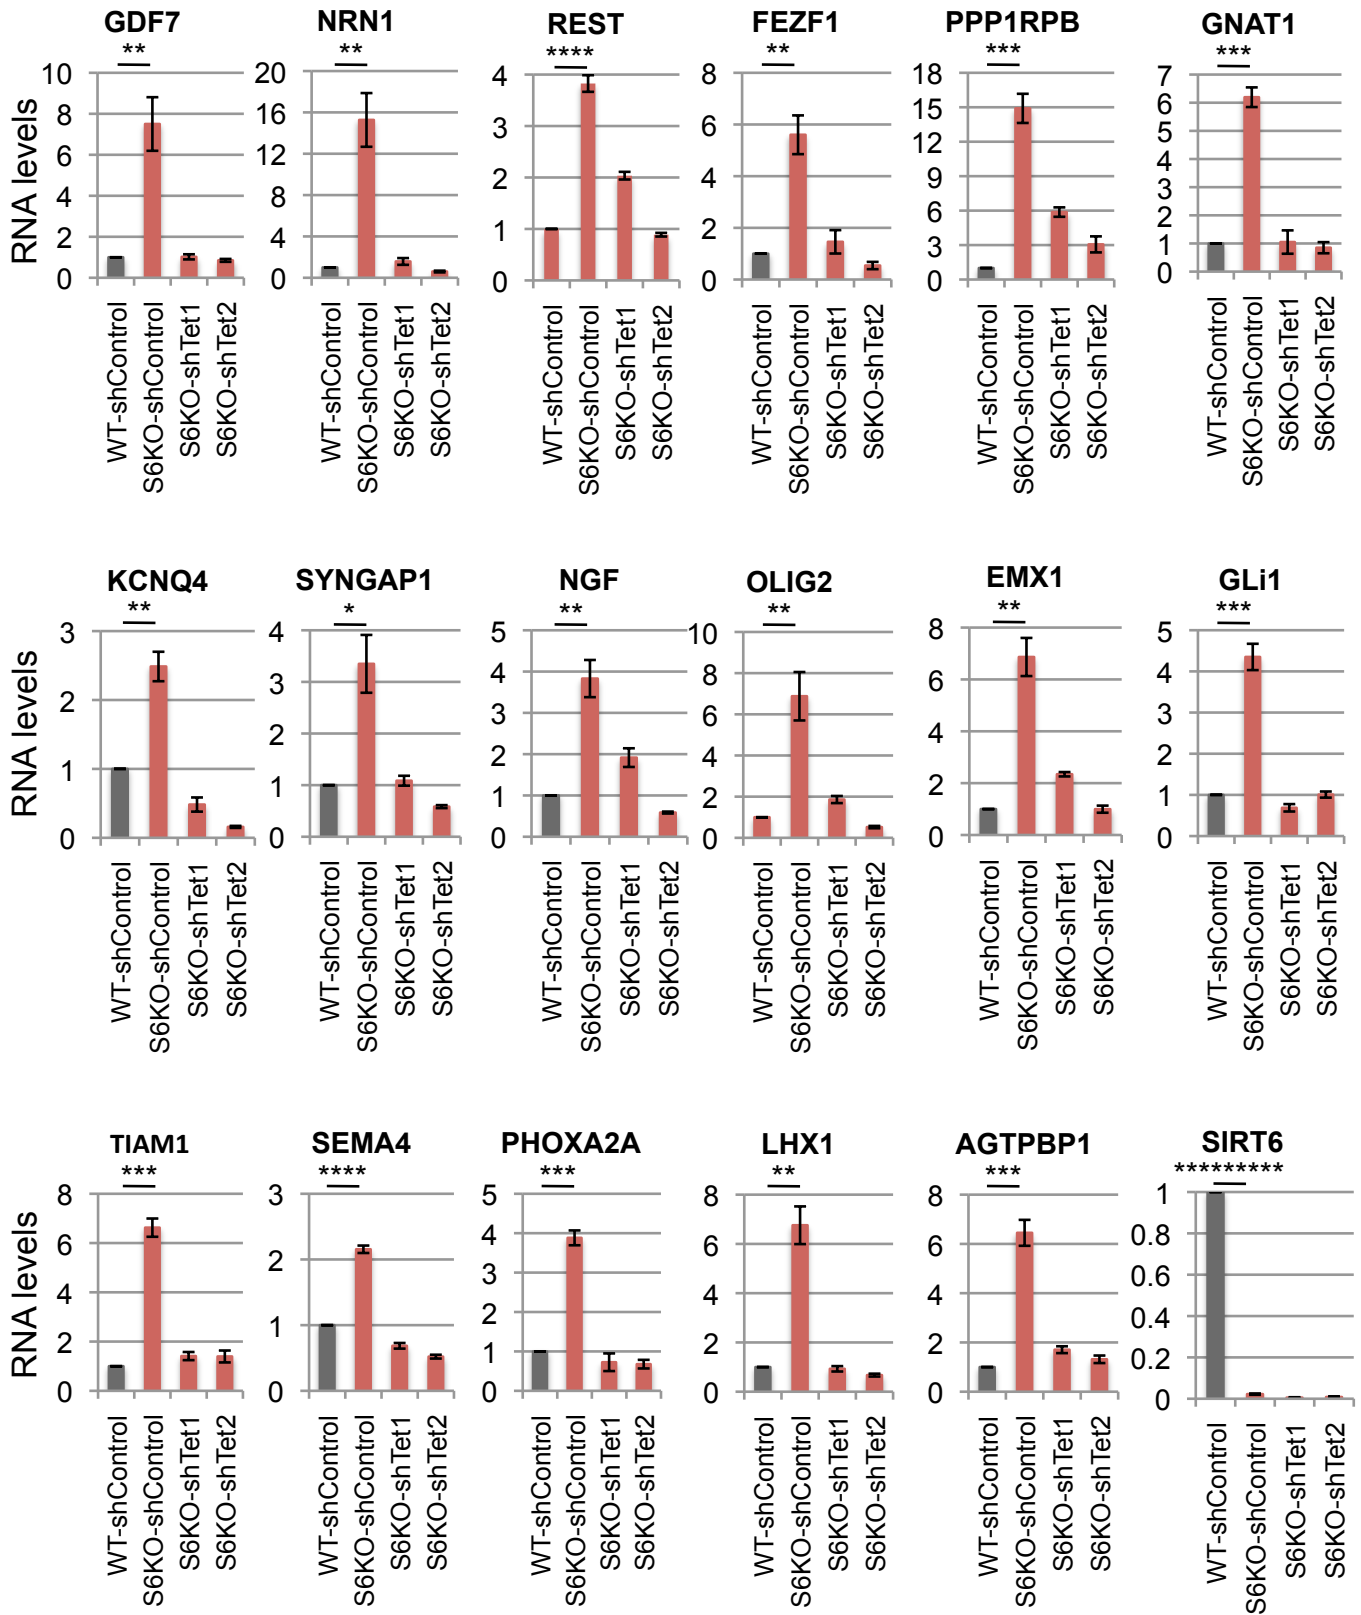

# Supplemental Figure S4

**A**

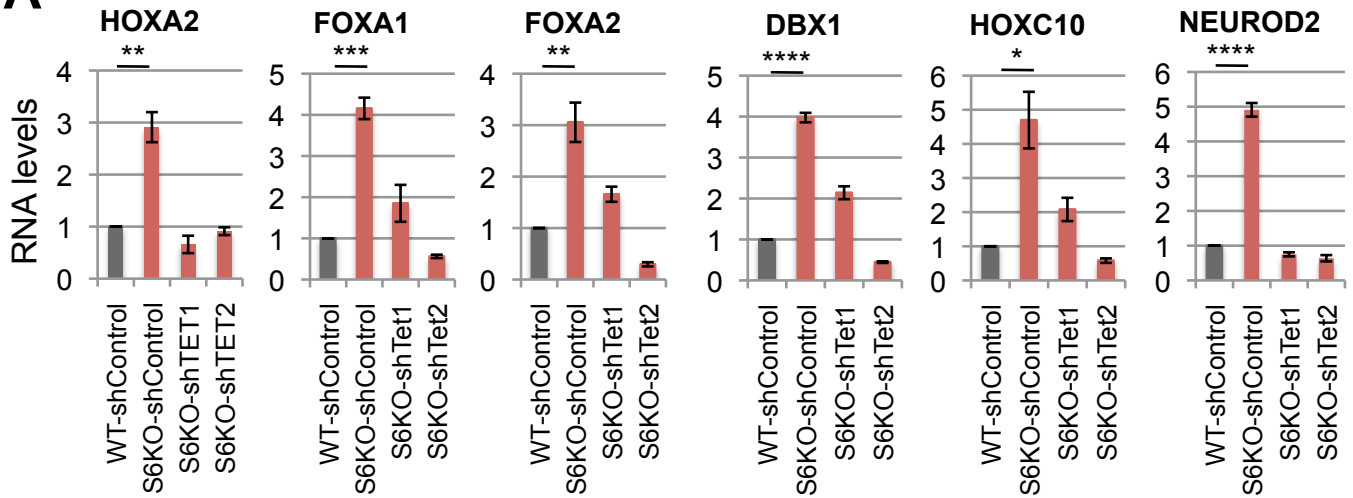

**B**

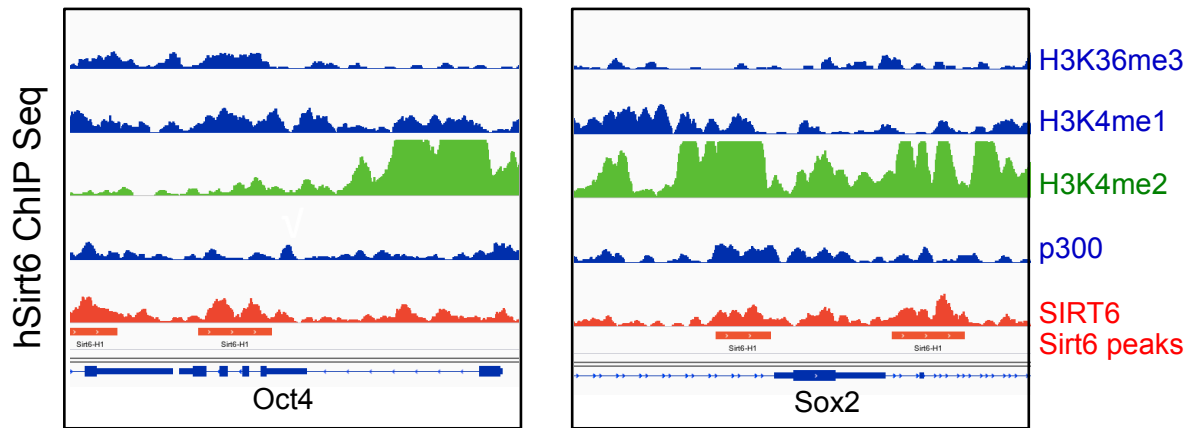

**C**

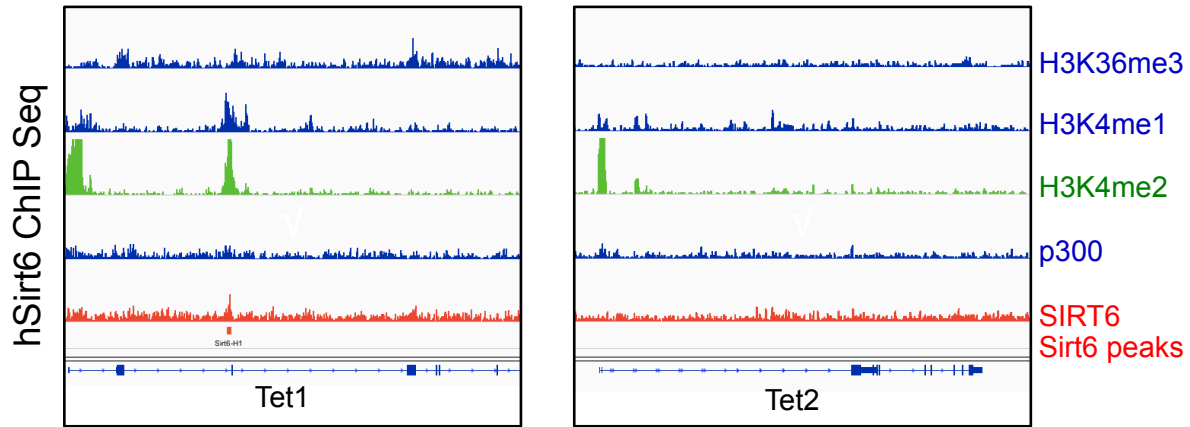

# Supplemental Figure S5

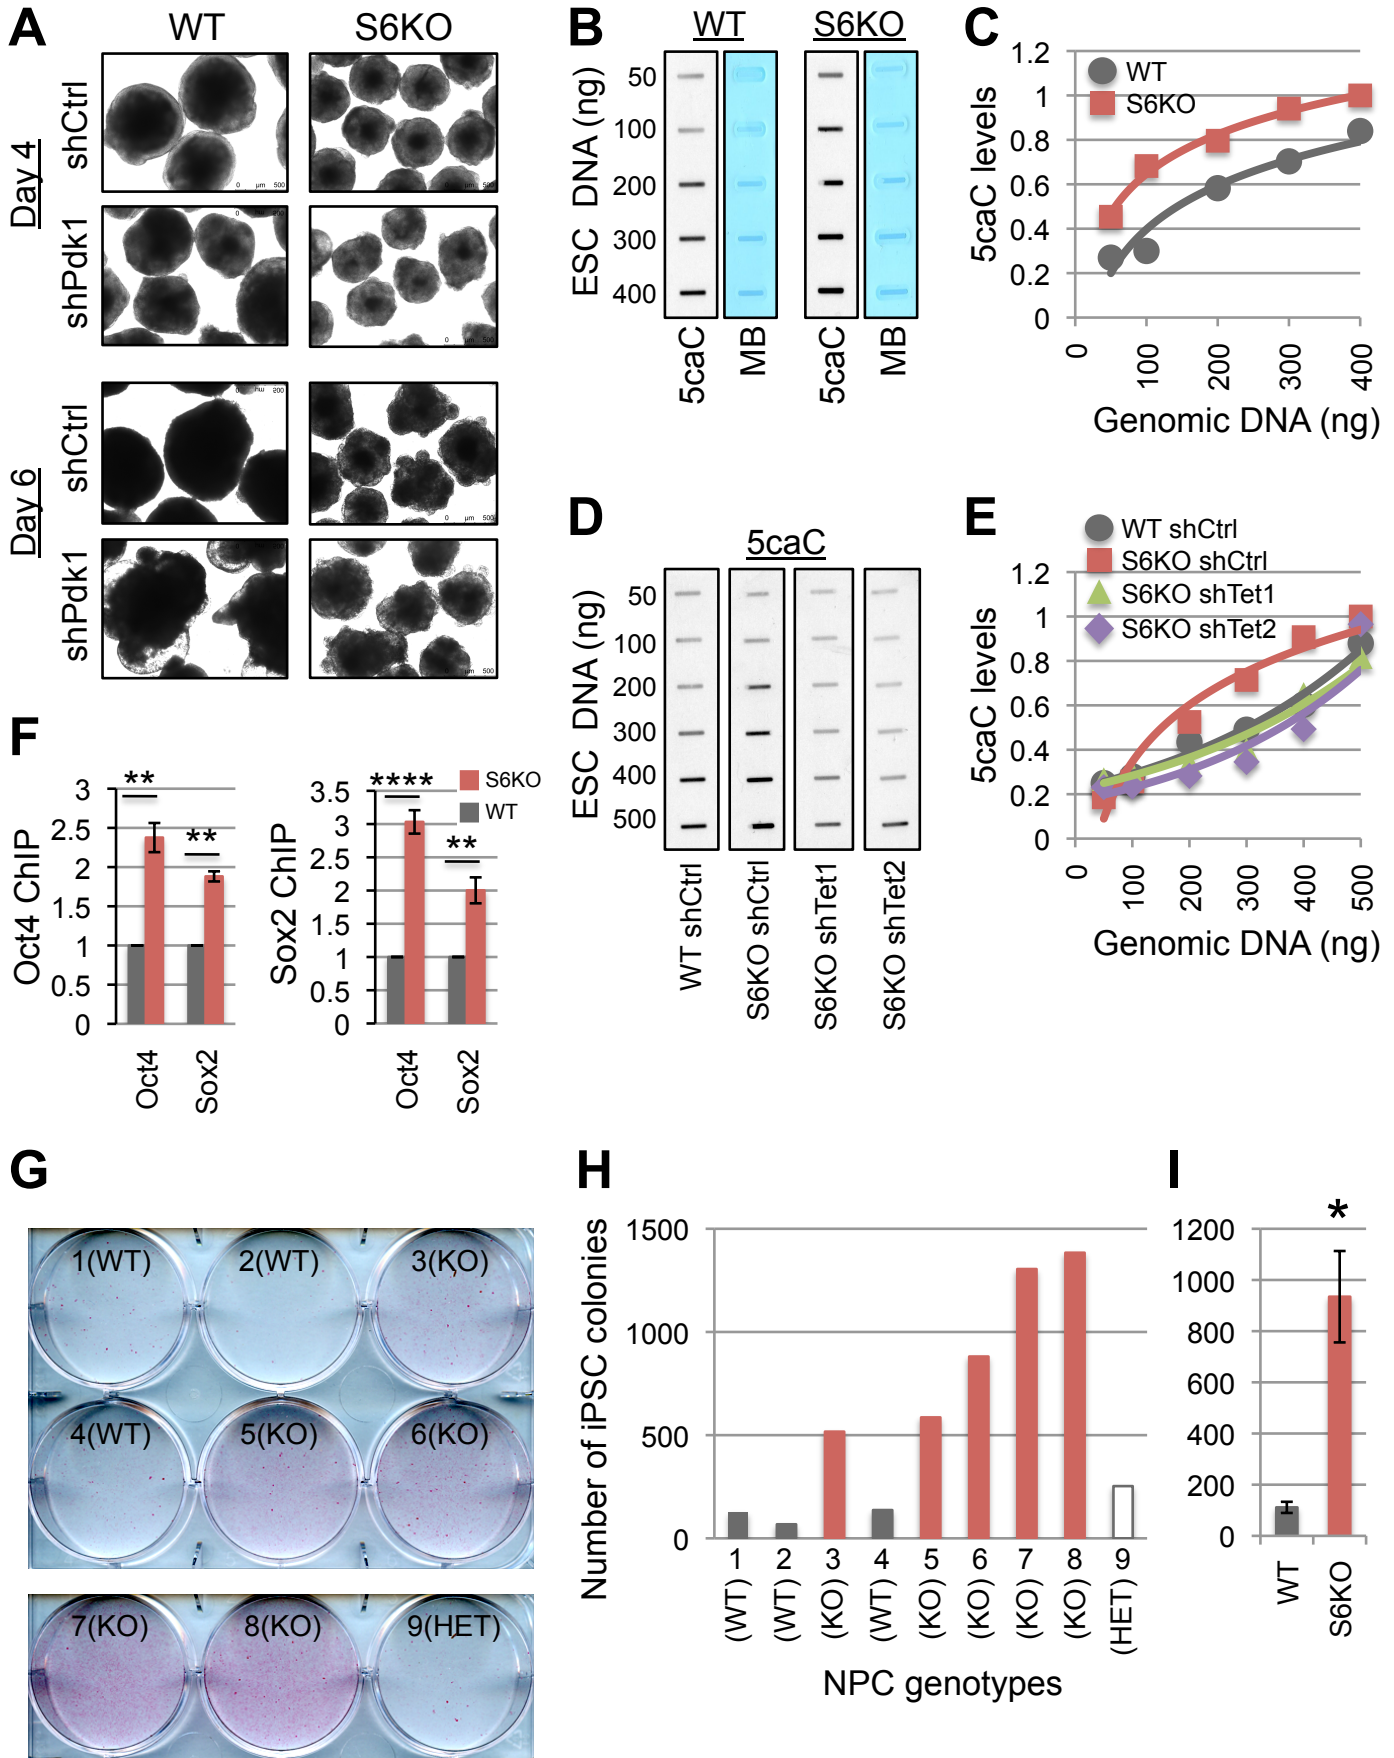

# Supplemental Figure S6

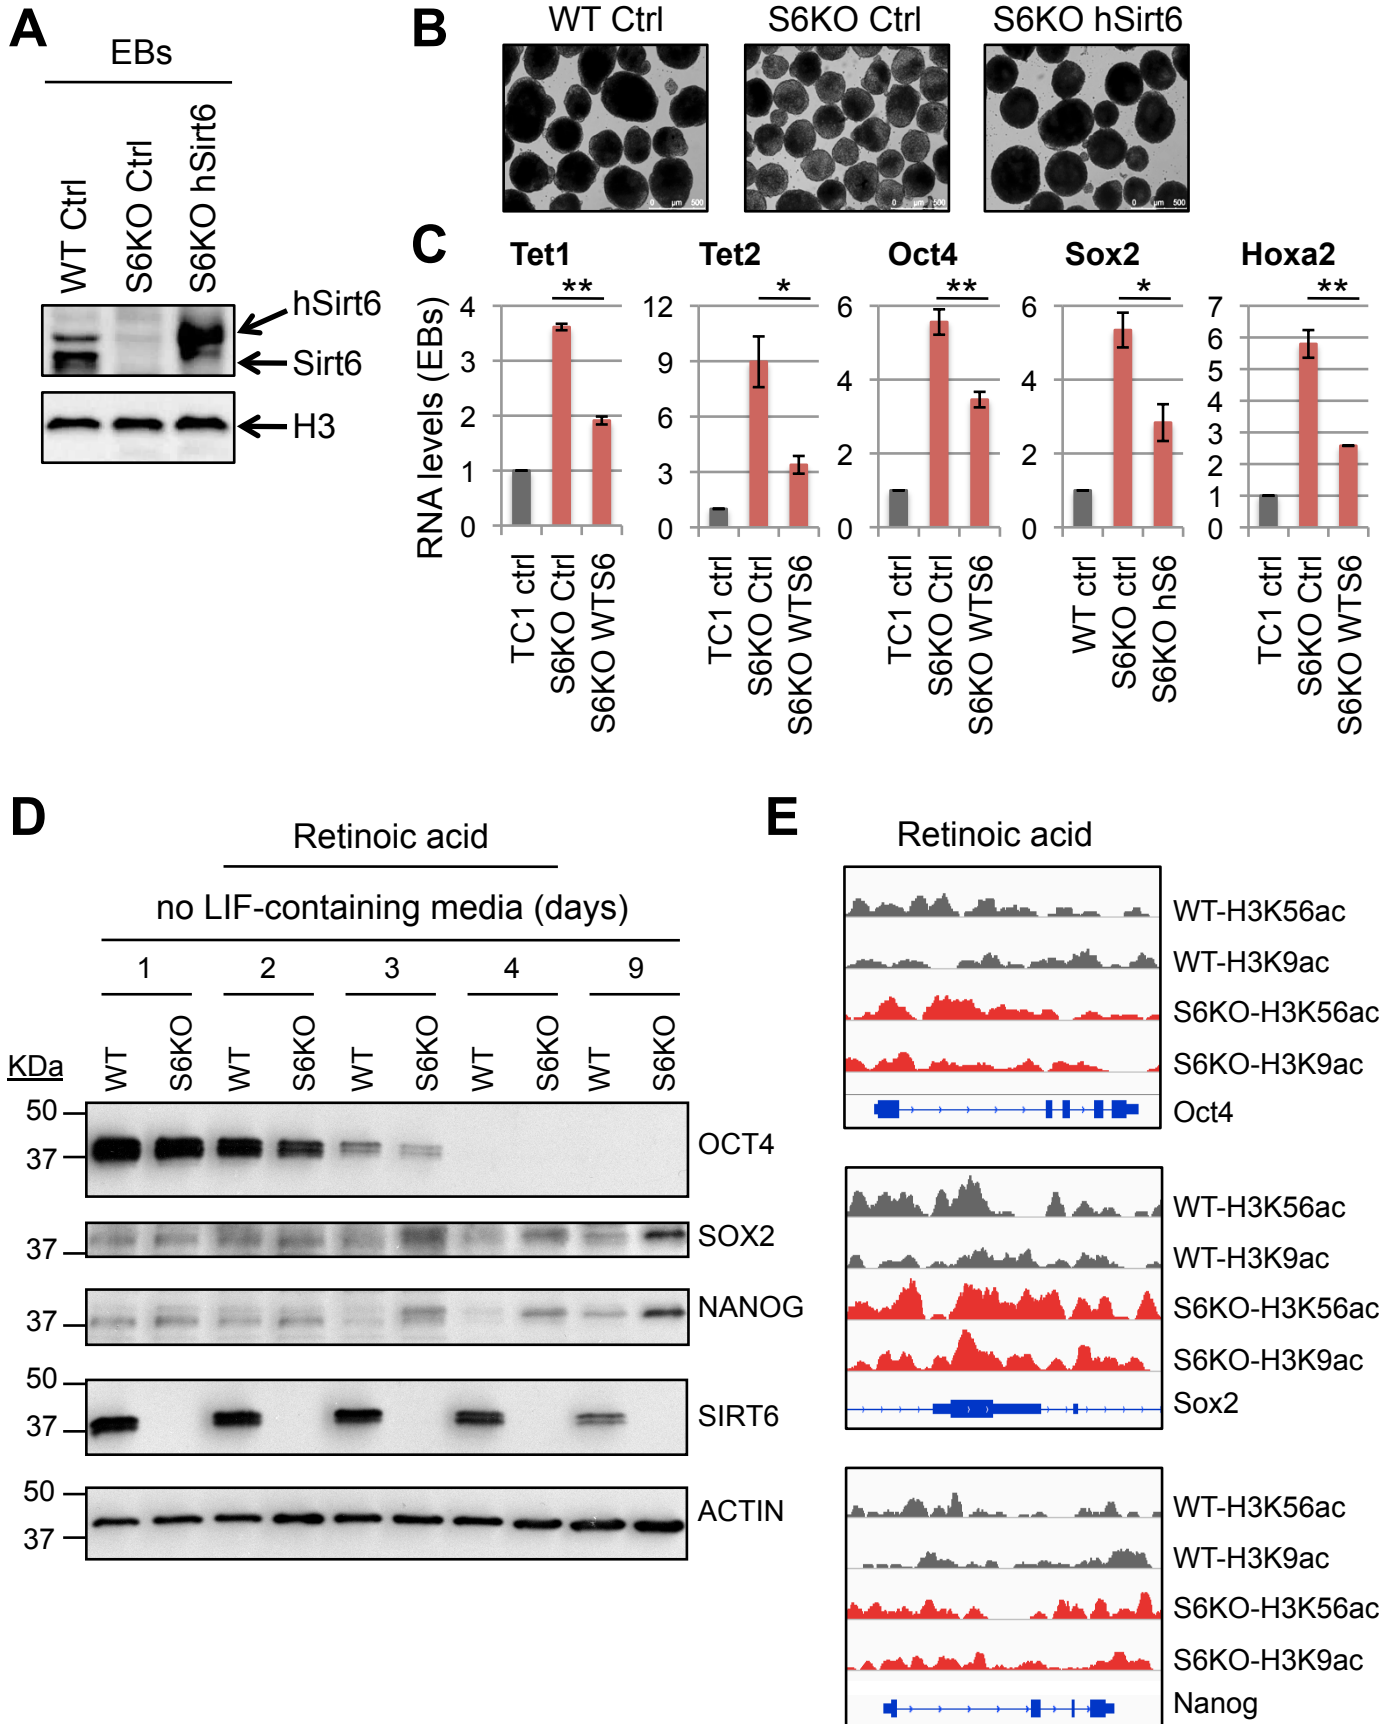

# Supplemental Figure S7

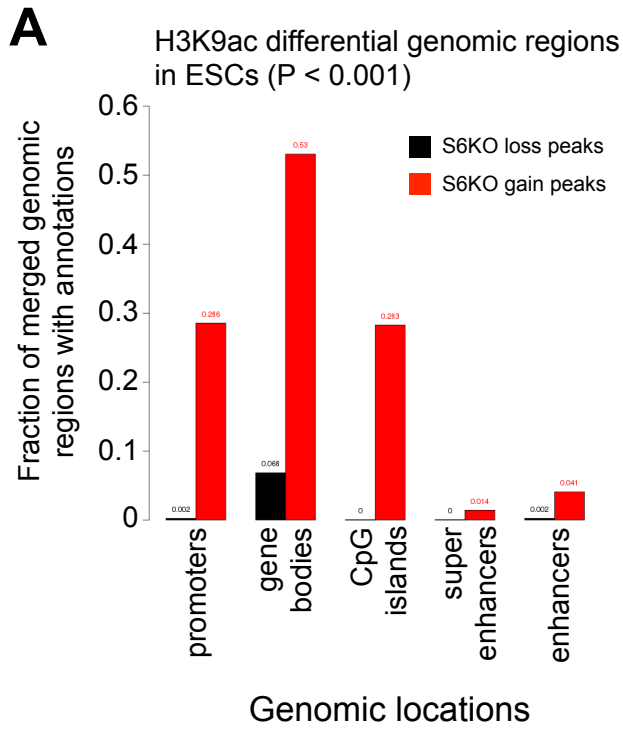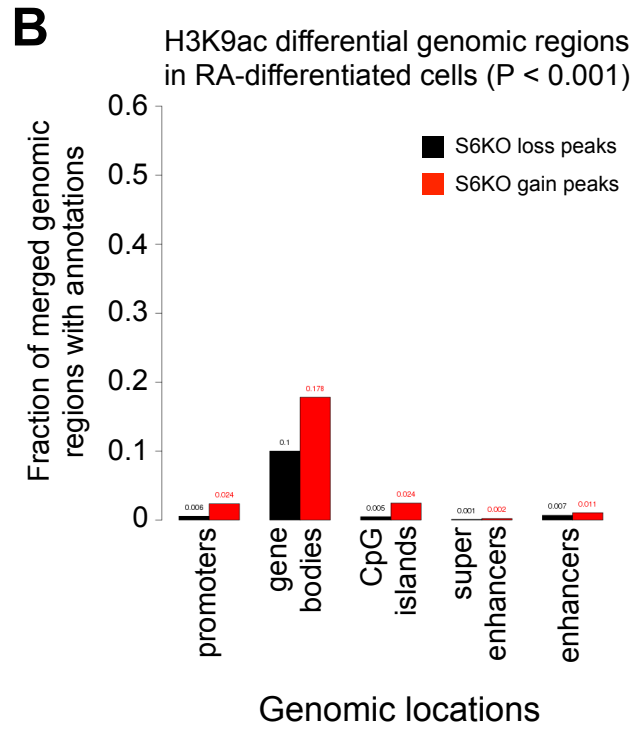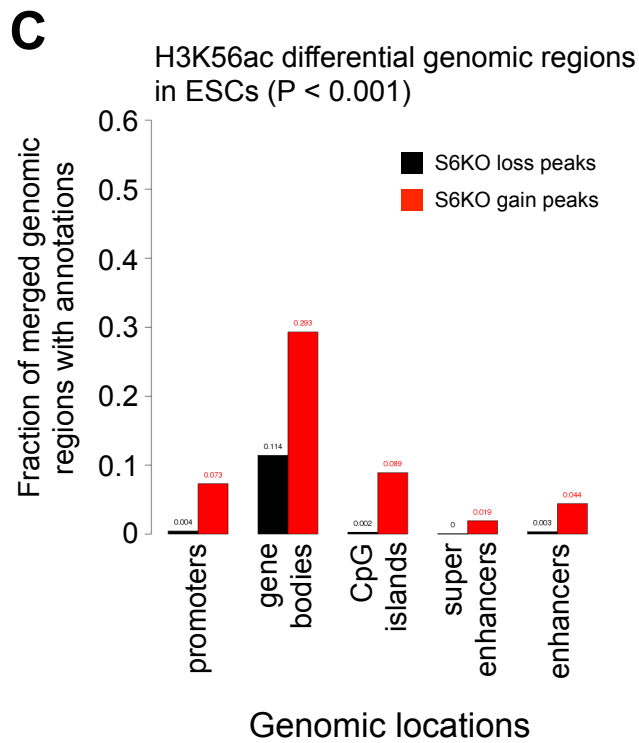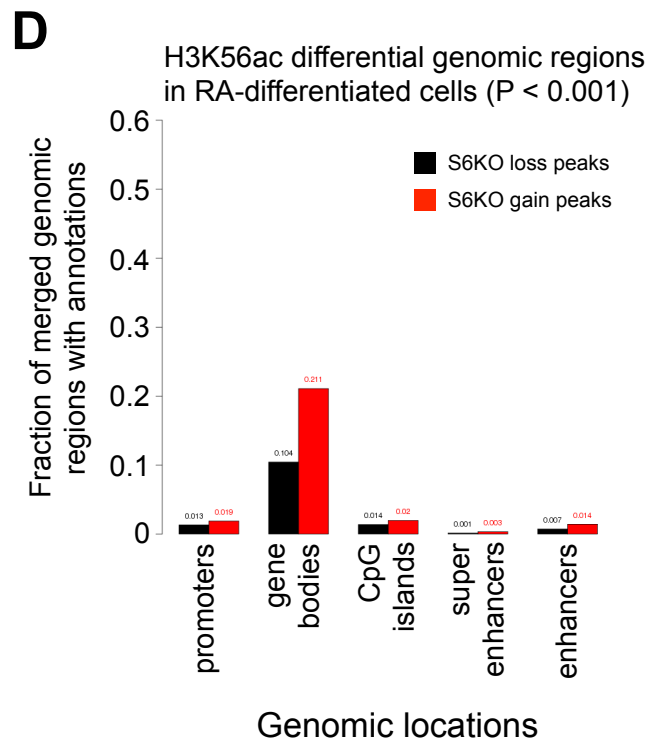

# Supplemental Figure S8

**A**

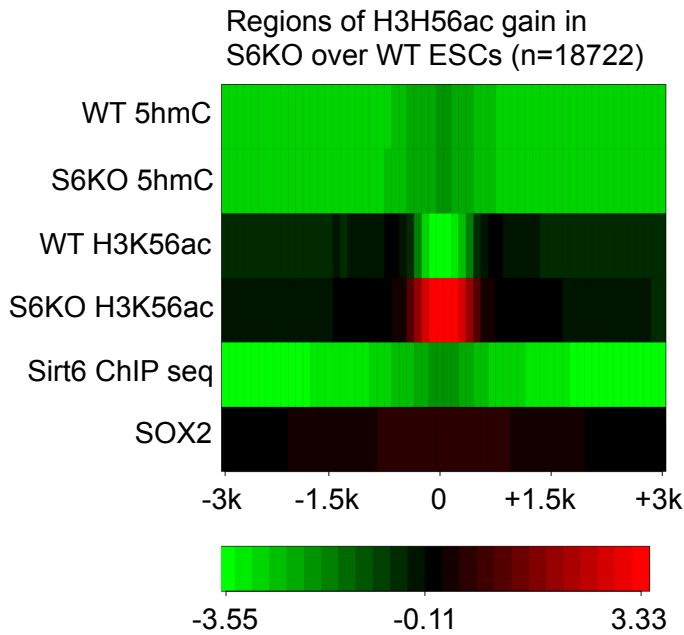

**B**

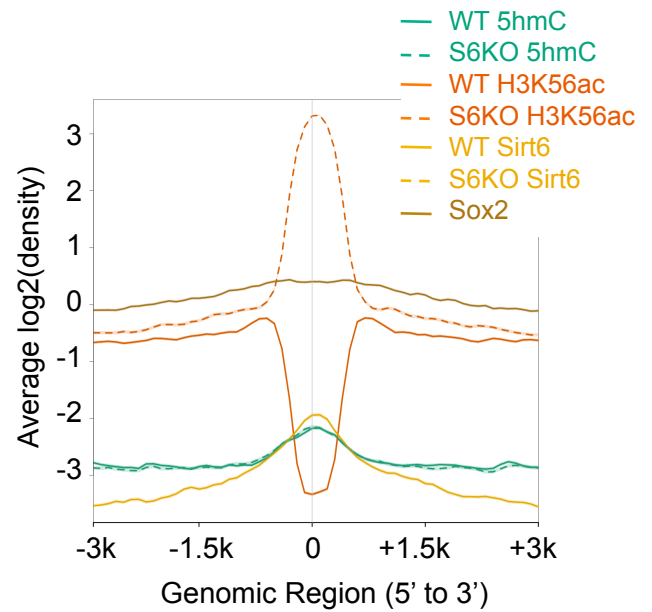

**C**

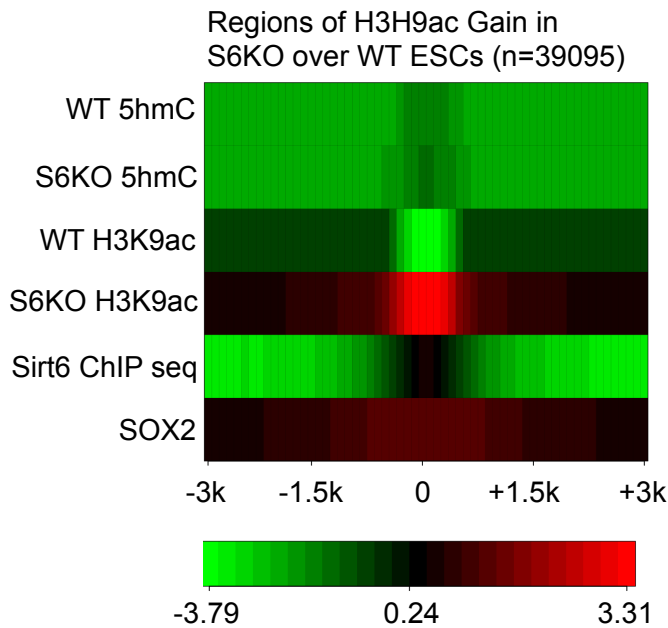

**D**

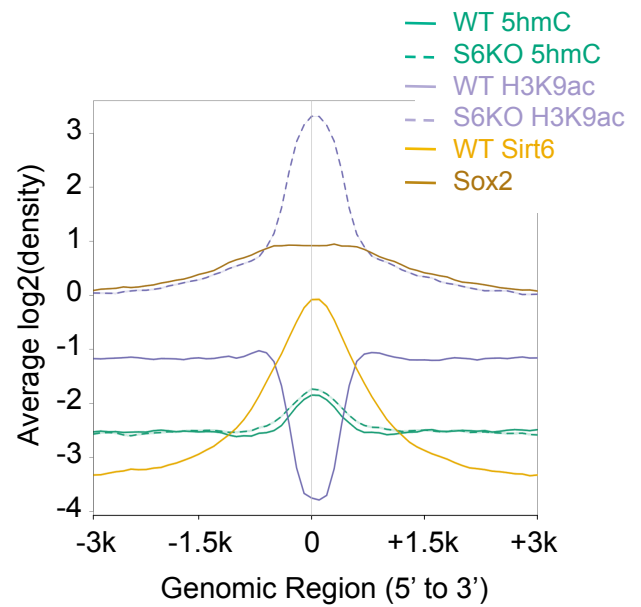

Supplement: NIHMS725229-supplement-SupplFig.pdf [file NIHMS725229-supplement-SupplFig.pdf]
